# Supplementary material for: Lung, Breast and Colorectal Cancer Incidence by Socioeconomic Status in Spain: A Population-Based Multilevel Study
Source: MDPI journal article supplement (doi:10.3390/cancers13112820), 2021-06-05
Supplement: s1 [file s1]

## Supplementary Files

**Supplementary Figure S1.** Map of peninsular Spain with the provinces of the study highlighted by anatomical site: (a) Colorectum, (b) Lung, (c) Breast.

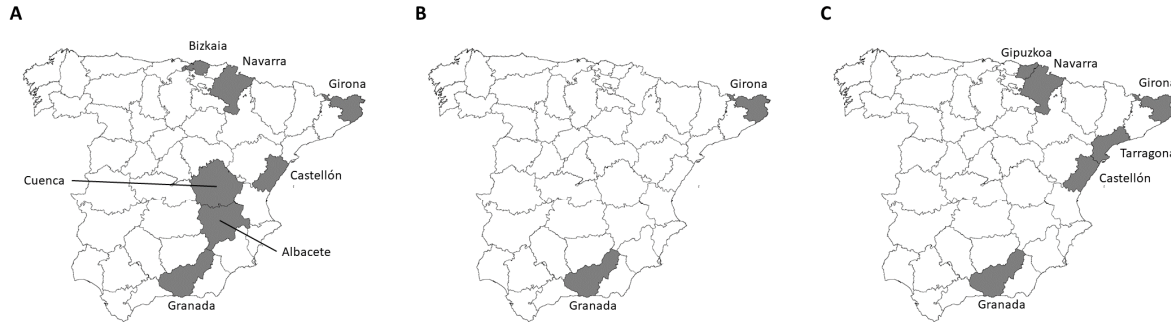

**Supplementary Figure S2.** Spanish deprivation index (2011) and average income (in €) per person (2015) by census tract in Spain, with generalized additive model (GAM) smoothing.

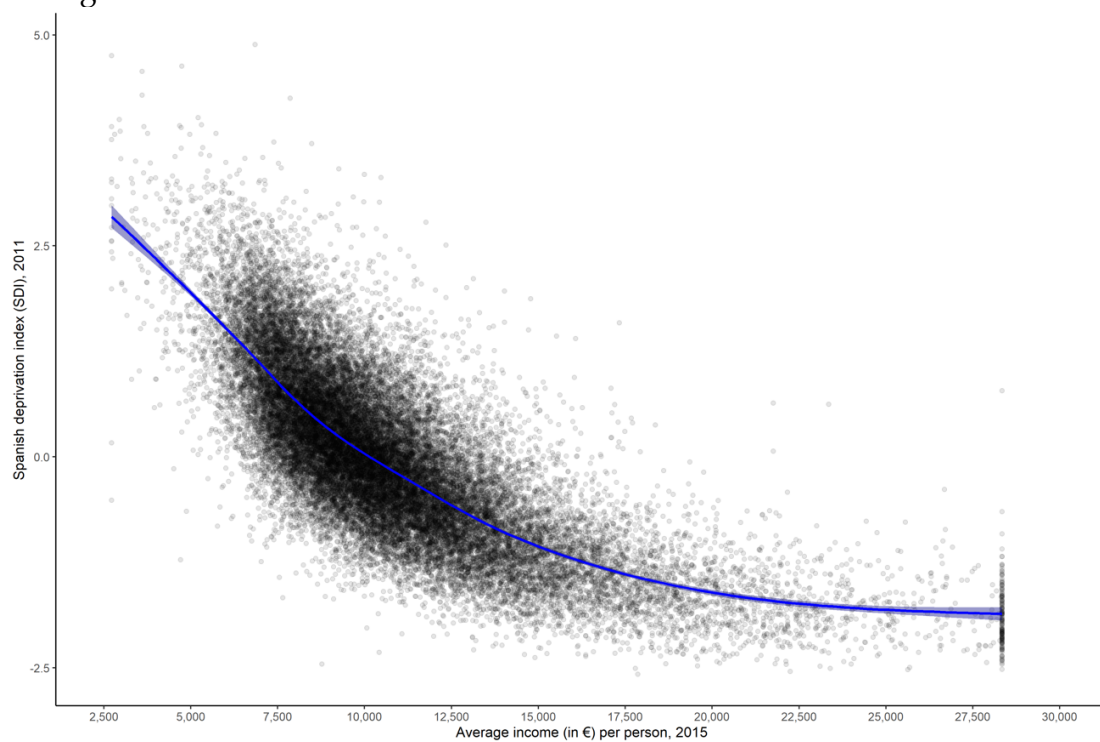

**Legend:** The range of average income was censored for confidentiality reasons.

**Supplementary Figure S3.** Quintiles of the Spanish Deprivation Index (SDI) by census tract in the capitals of the nine Spanish provinces of study, 2011.

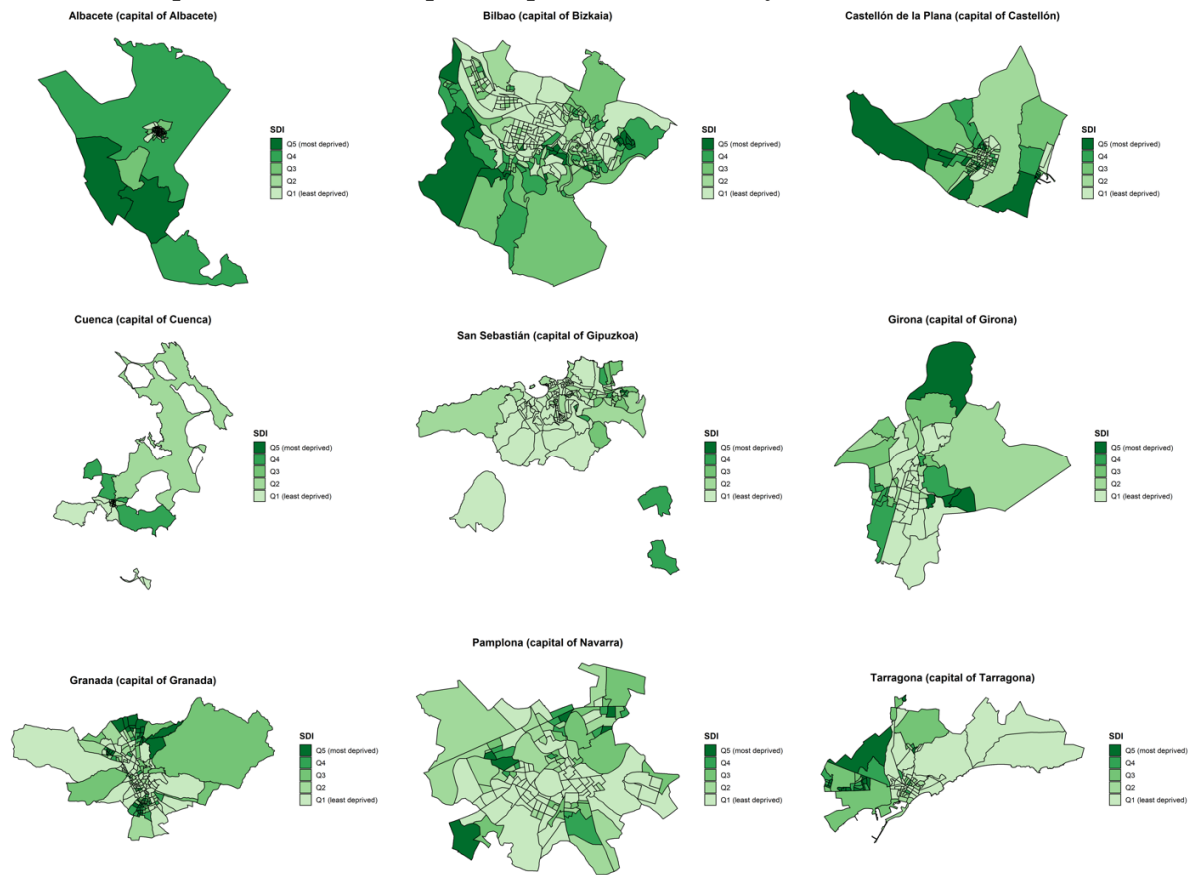

**Supplementary Figure S4.** Colorectal cancer smoothed cancer incidence rates adjusted for deprivation and age by census tract in the area of the capital of province in seven Spanish provinces during 2010-2013.

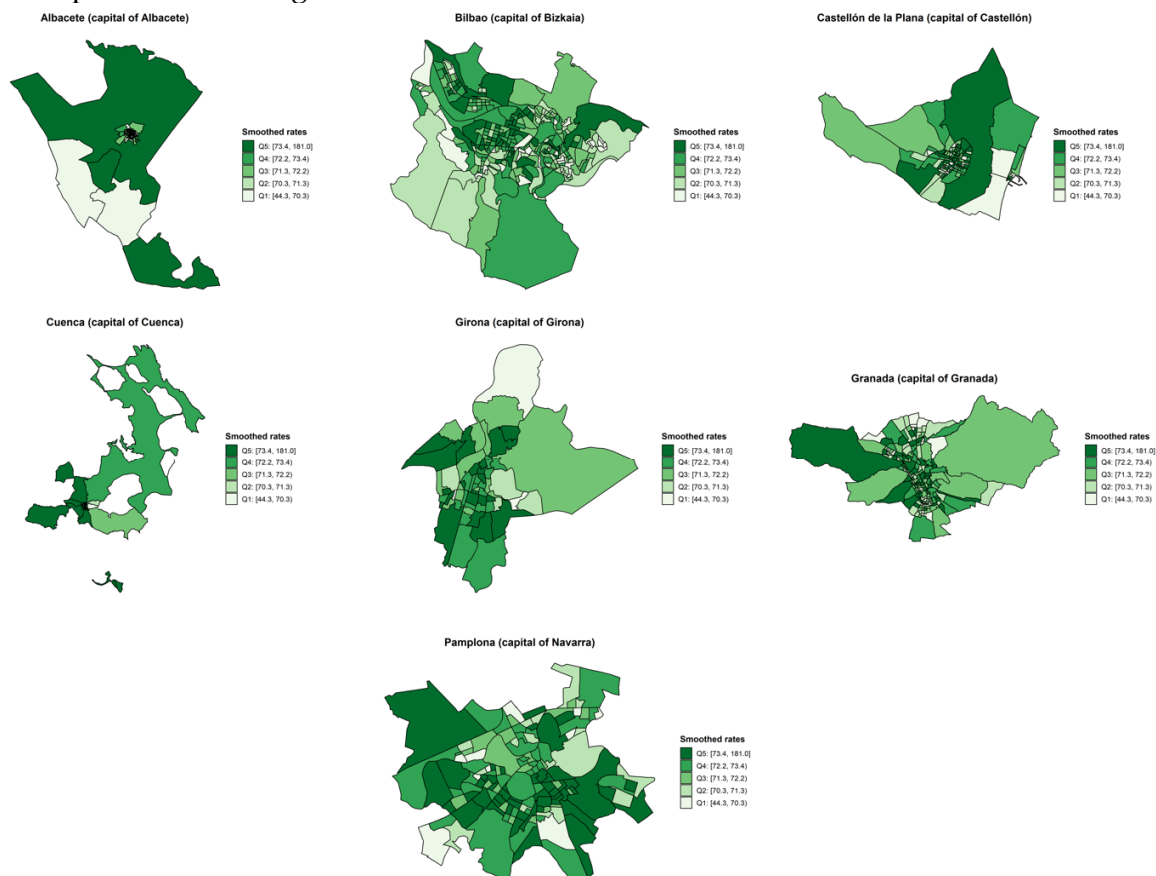

**Supplementary Figure S5.** Lung cancer smoothed cancer incidence rates adjusted for deprivation and age by census tract in the area of the capital of province in two Spanish provinces during 2010-2013.

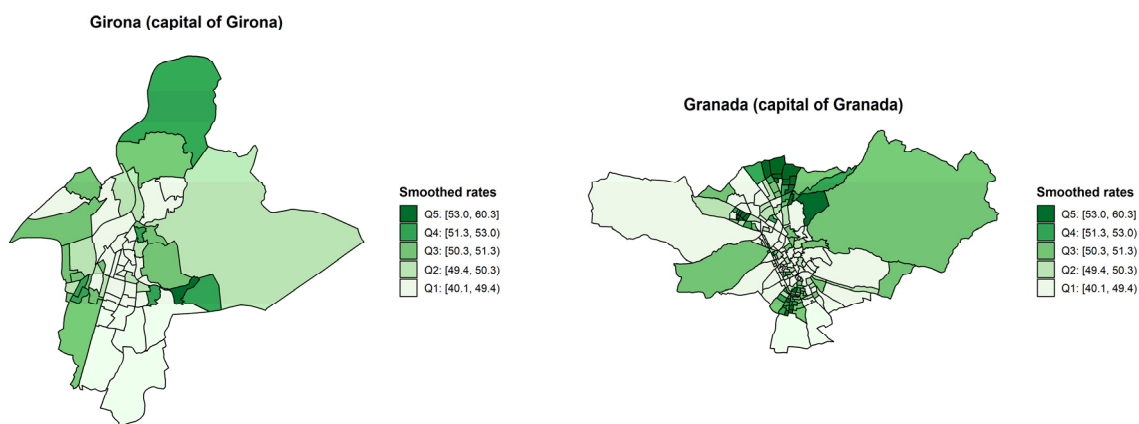

**Supplementary Figure S6.** Breast cancer smoothed cancer incidence rates adjusted for deprivation and age by census tract in the area of the capital of province in six Spanish provinces during 2010-2013.

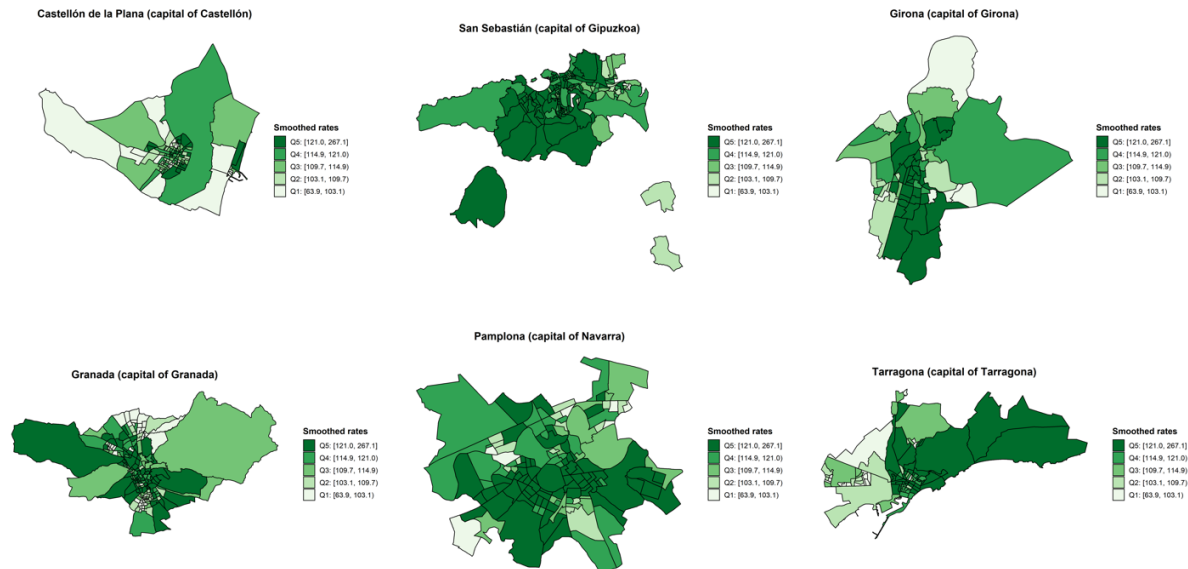

**Supplementary Table S1.** Number of colorectal cancer cases, population at risk, and crude cancer incidence rates by year of diagnosis, and province in Spain during 2010-2013.

| Province       | Cases | Population | Incidence rate* (95%CI) |
|----------------|-------|------------|-------------------------|
| Albacete 2011  | 217   | 402,318    | 53.9 (47.0–61.6)        |
| Albacete 2012  | 185   | 402,837    | 45.9 (39.5–53.0)        |
| Bizkaia 2011   | 633   | 1,155,727  | 54.8 (50.6–59.2)        |
| Castellón 2011 | 412   | 604,344    | 68.2 (61.8–75.1)        |
| Castellón 2012 | 398   | 604,564    | 65.8 (59.5–72.6)        |
| Cuenca 2010    | 137   | 217,716    | 62.9 (52.8–74.4)        |
| Cuenca 2011    | 171   | 219,138    | 78.0 (66.8–90.7)        |
| Cuenca 2012    | 146   | 218,036    | 67.0 (56.6–78.8)        |
| Girona 2011    | 497   | 756,810    | 65.7 (60.0–71.7)        |
| Granada 2011   | 540   | 924,499    | 58.4 (53.6–63.6)        |
| Navarra 2013   | 487   | 641,129    | 76.0 (69.4–83.0)        |

\* Per 100,000 people

**Supplementary Table S2.** Number of lung cancer cases, population at risk, and crude cancer incidence rates by anatomical site, year of diagnosis, and province in Spain during 2011-2012.

| Province     | Cases | Population | Incidence rate* (95%CI) |
|--------------|-------|------------|-------------------------|
| Girona 2011  | 310   | 756,744    | 41.0 (36.5–45.8)        |
| Granada 2011 | 375   | 924,550    | 40.6 (36.6–44.9)        |
| Granada 2012 | 382   | 922,837    | 41.4 (37.4–45.8)        |

\* Per 100,000 people

**Supplementary Table S3.** Number of breast cancer cases, population at risk, and crude cancer incidence rates by anatomical site, year of diagnosis, and province in Spain during 2010-2013.

| Province       | Cases | Population | Incidence rate* (95%CI) |
|----------------|-------|------------|-------------------------|
| Castellón 2011 | 302   | 301,462    | 100.2 (89.2–112.1)      |
| Castellón 2012 | 302   | 301,406    | 100.2 (89.2–112.2)      |
| Girona 2010    | 365   | 371,722    | 98.2 (88.4–108.8)       |
| Girona 2011    | 406   | 375,324    | 108.2 (97.9–119.2)      |
| Gipuzkoa 2011  | 482   | 361,706    | 133.3 (121.6–145.0)     |
| Granada 2011   | 499   | 467,365    | 106.8 (97.6–116.6)      |
| Navarra 2013   | 443   | 321,814    | 137.7 (125.1–151.1)     |
| Tarragona 2011 | 358   | 401,669    | 89.1 (80.1–98.9)        |

\* Per 100,000 people
